# Supplementary material for: Interactions between photoacidic 3-hydroxynaphtho[1,2-b]quinolizinium and cucurbit[7]uril: Influence on acidity in the ground and excited state
Source: publisher site journal article supplement (doi:10.3762/bjoc.13.23), 2017-02-01
Supplement: Additional file 1 [file 1860-5397-13-23-S1.pdf]

**Supporting Information**  
for  
**Interactions between photoacidic 3-hydroxy-naphtho[1,2-*b*]quinolizinium and cucurbit[7]uril: Influence on acidity in the ground and excited state**

Jonas Becher, Daria V. Berdnikova, Darinka Dzubieli, Heiko Ihmels\* and Phil M.

Pithan

Address: Department of Chemistry and Biology, University of Siegen and Center of Micro- and Nanochemistry and Engineering, Adolf-Reichwein-Str. 2, 57068 Siegen, Germany

Email: Heiko Ihmels - ihmels@chemie.uni-siegen.de

\* Corresponding author

**NMR spectra of compounds 2 and 5; fluorimetric titrations of 2 with acid and CB[7]; determination of 0-0 transition energies; analysis of binding isotherms from photometric titrations of 2 with CB[7]**

**Table of contents**

|   |                                                                                 |    |
|---|---------------------------------------------------------------------------------|----|
| 1 | Additional spectroscopic data.....                                              | S2 |
| 2 | <sup>1</sup> H NMR and <sup>13</sup> C NMR spectra of derivatives 2 and 5 ..... | S5 |

## 1 Additional spectroscopic data

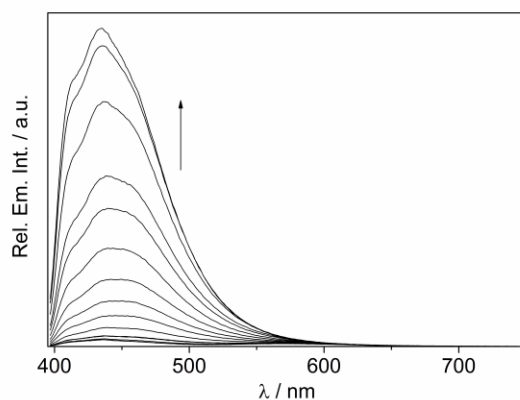

**Figure S1:** Spectrofluorimetric titration of **2** ( $c = 10 \mu\text{M}$  in  $\text{H}_2\text{O}$ ) with aq  $\text{HClO}_4$  (70%);  $\lambda_{\text{ex}} = 380 \text{ nm}$ .

The arrow indicates the changes of the spectrum upon successive addition of  $\text{HClO}_4$ .

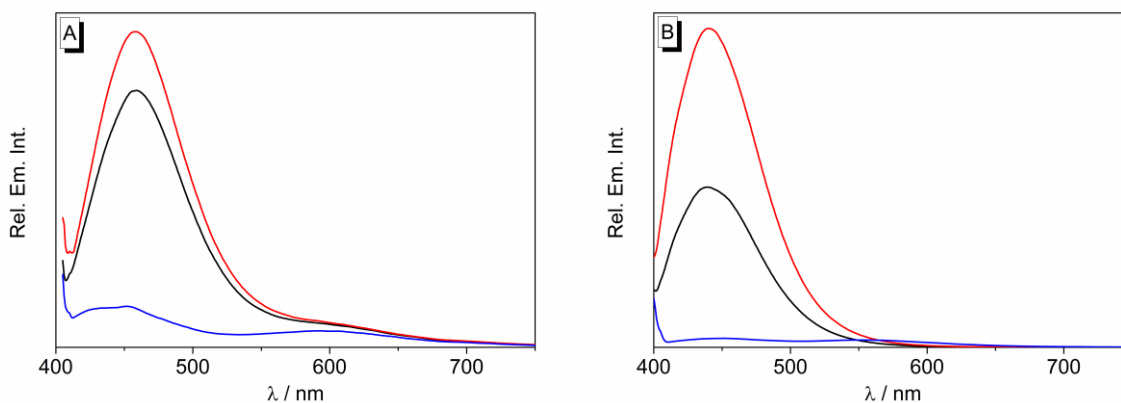

**Figure S2:** Emission spectra of **2** ( $c_L = 10 \mu\text{M}$ ) in MeOH (A,  $\lambda_{\text{ex}} = 400 \text{ nm}$ ) and MeCN (B,  $\lambda_{\text{ex}} = 398 \text{ nm}$ ). Black lines: without addition, red: upon addition of  $\text{CF}_3\text{COOH}$ , blue: upon addition of DBU.

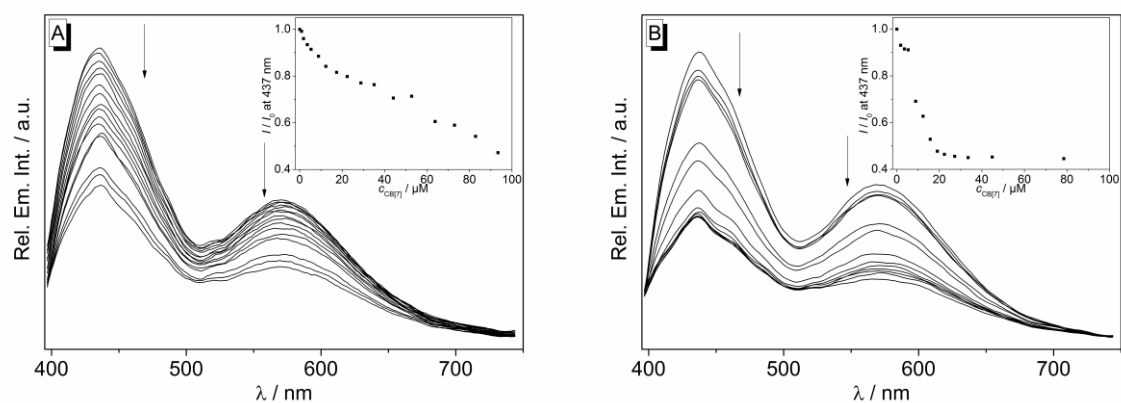

**Figure S3:** Spectrofluorimetric titration ( $\lambda_{\text{ex}} = 380 \text{ nm}$ ) of CB[7] ( $c = 453 \text{ } \mu\text{M}$ ) to naphthoquinolizinium **2** ( $c = 15 \text{ } \mu\text{M}$ ) in BPE buffer (with 10% v/v DMSO) at pH 5 (A) and pH 7 (A). Arrows indicate the development of bands with increasing concentration of CB[7]. Insets: Plot of relative emission,  $I/I_0$ , at  $\lambda = 437 \text{ nm}$  versus concentration of CB[7].

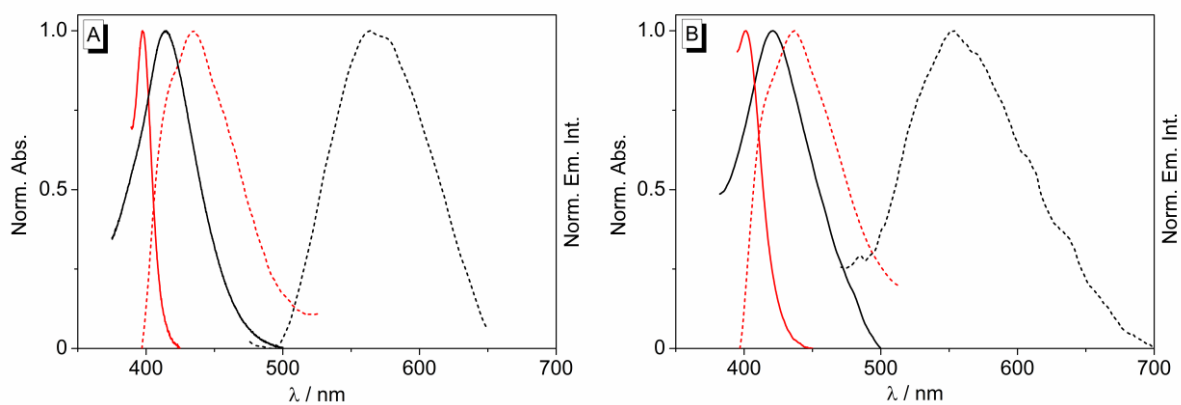

**Figure S4:** Normalized absorption (continuous lines) and emission bands (dashed lines) of naphthoquinolizinium **2** ( $c = 15 \text{ } \mu\text{M}$ ) in the absence (A) and in the presence (B) of CB[7] ( $c_{\text{CB[7]}} = 100 \text{ } \mu\text{M}$ ); red: major band under acidic conditions, black: major band under alkaline conditions.

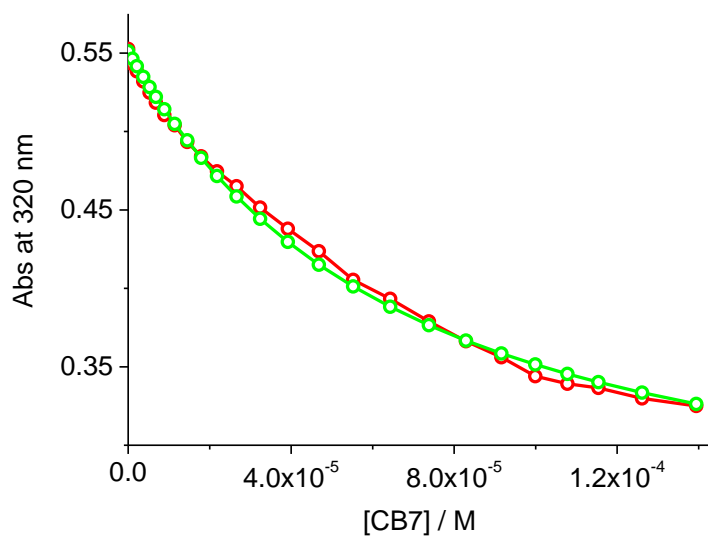

**Figure S5:** Binding isotherms, i.e. plot of absorption of **2** at  $\lambda = 320$  nm versus  $c_{\text{CB}[7]}$  obtained from photometric titration of **2** with CB[7] at pH 5; red = experimental data, green: fit to the theoretical model.

## 2 <sup>1</sup>H NMR and <sup>13</sup>C NMR spectra of derivatives 2 and 5

PROTON\_01

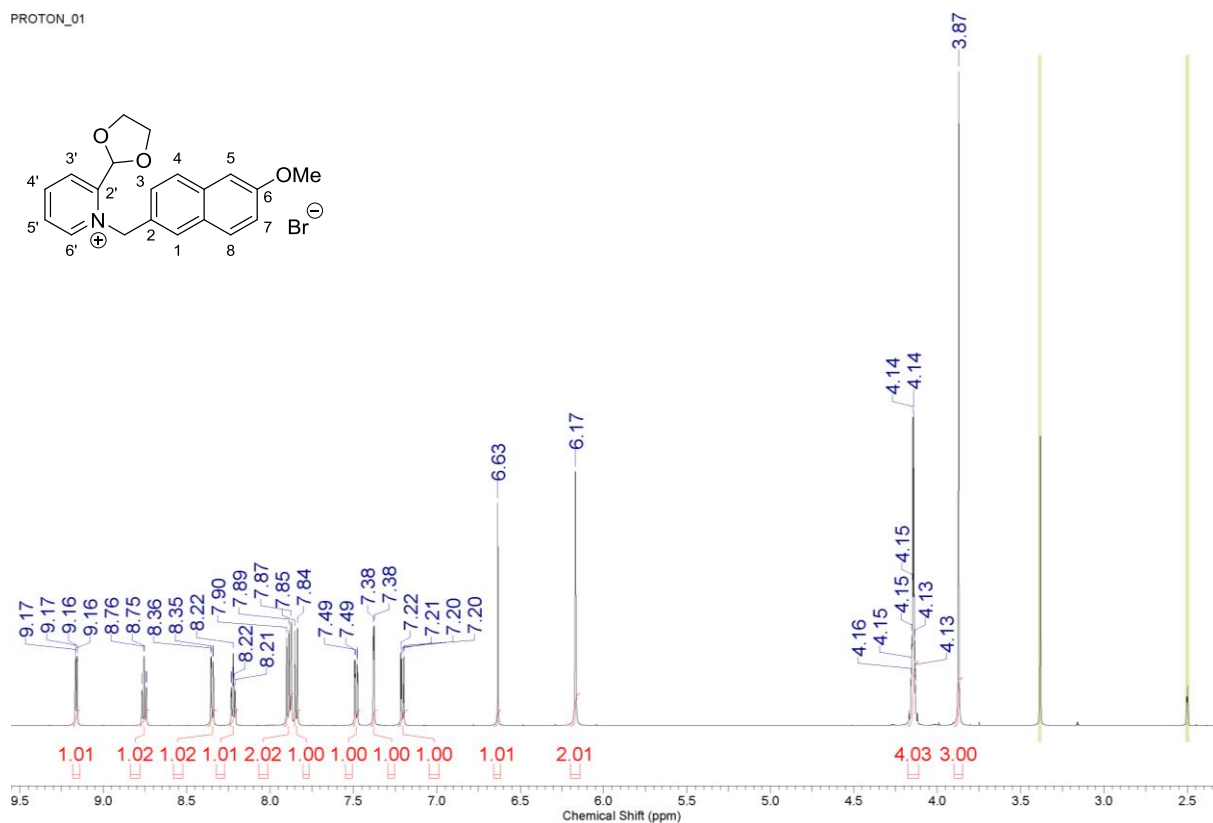

**Figure S6:** <sup>1</sup>H NMR spectrum of 2-(1,3-dioxolan-2-yl)-1-[(6-methoxynaphth-2-yl)methyl]pyridinium bromide (5).

CARBON\_01

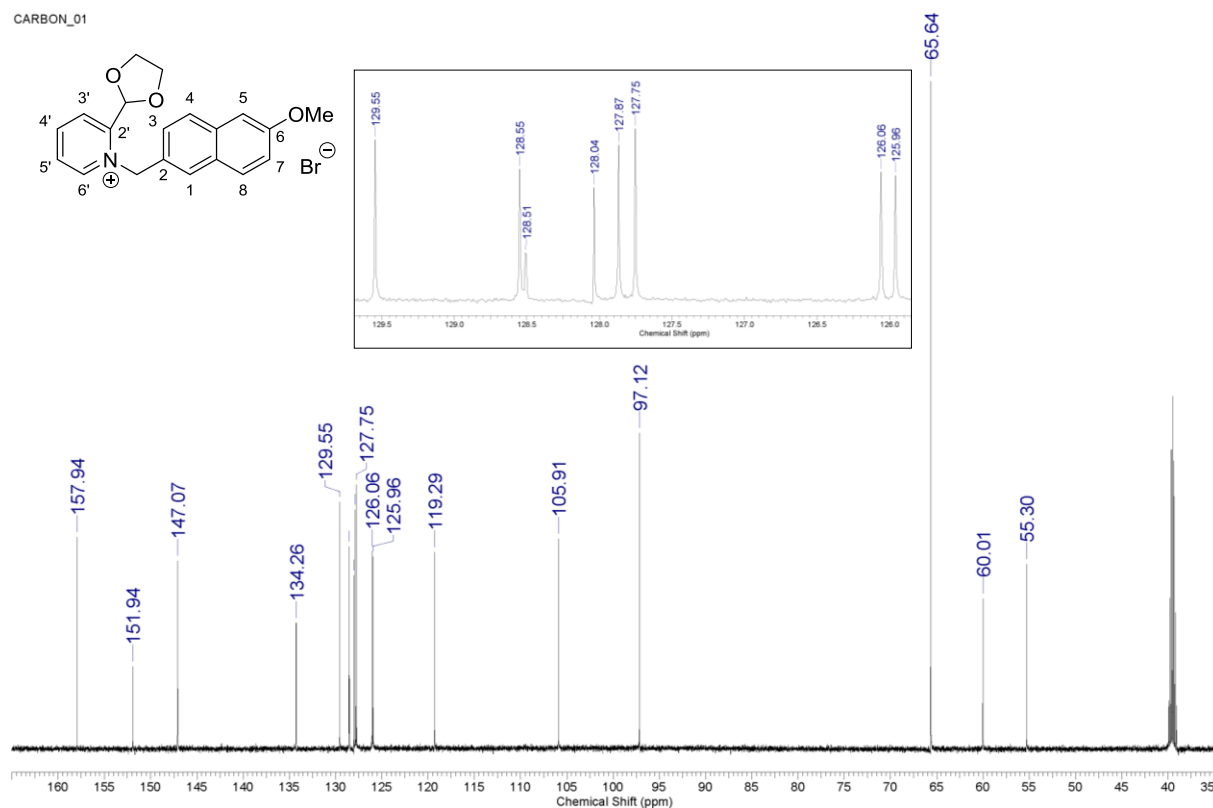

**Figure S7:** <sup>13</sup>C NMR spectrum of 2-(1,3-dioxolan-2-yl)-1-[(6-methoxynaphth-2-yl)methyl]pyridinium bromide (5).

dd-1-72 1H.esp

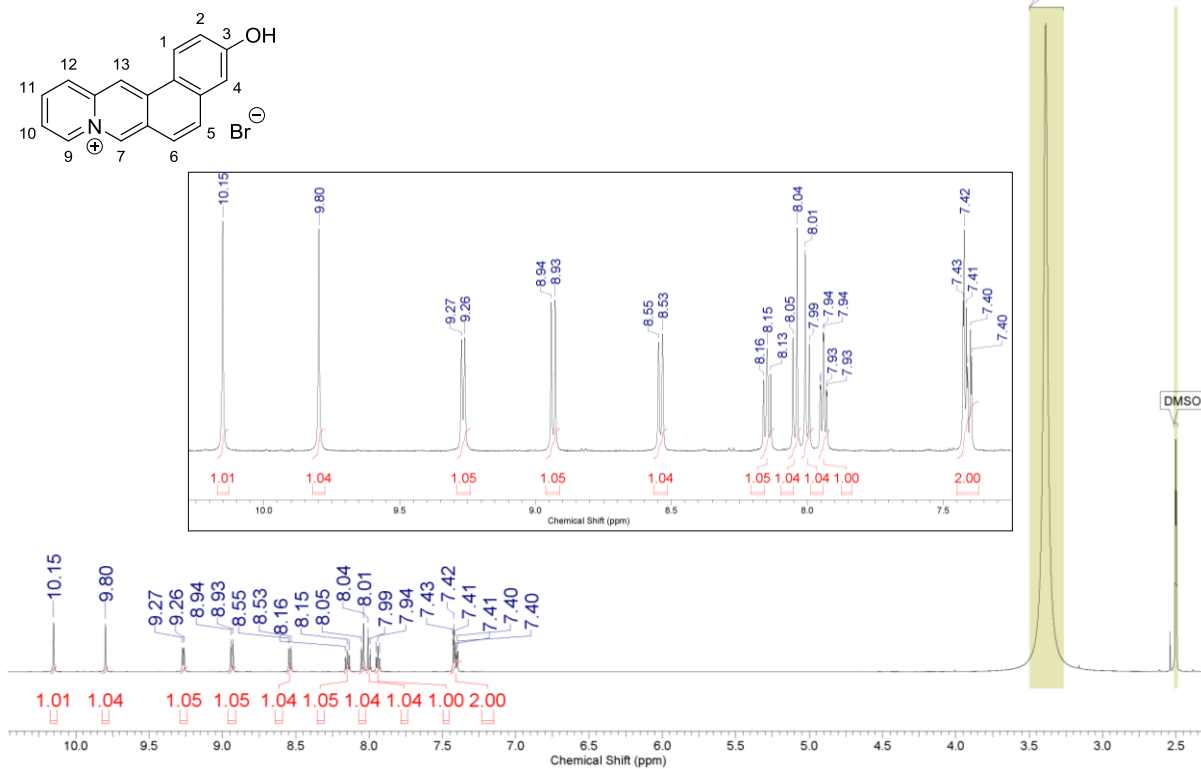

**Figure S8:** <sup>1</sup>H NMR spectrum of 3-hydroxynaphtho[1,2-*b*]quinolizinium bromide (2).

dd-1-72 13C.esp

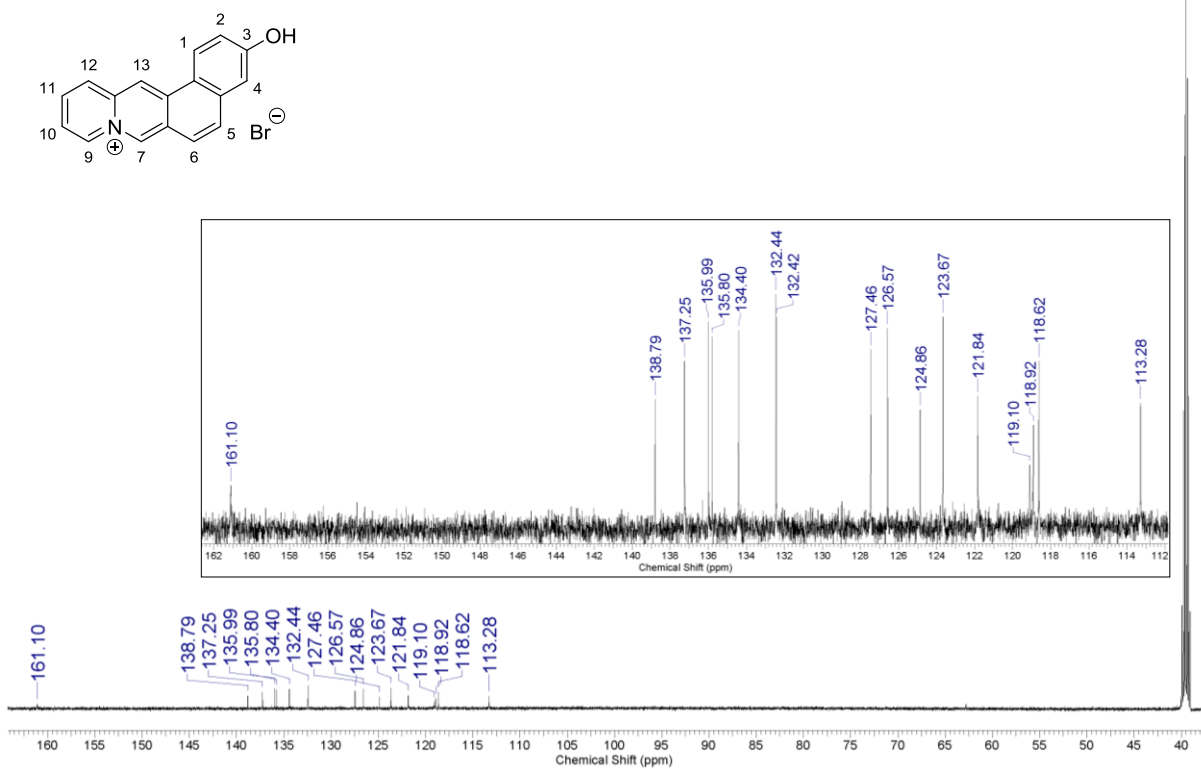

**Figure S9:** <sup>13</sup>C NMR spectrum of 3-hydroxynaphtho[1,2-*b*]quinolizinium bromide (2).
